# Supplementary material
Source: publisher figshare collection journal article supplement (https://acs.figshare.com/ndownloader/files/10635232)
Supplement: Supplementary file 1 [file 10635232]

## Supporting Information

### Formation of Anisotropic Liquid Crystalline Nanoparticles via Polymerization Induced Hierarchical Self-Assembly

Song Guan,<sup>†,§</sup> Chen Zhang,<sup>†</sup> Wei Wen,<sup>†</sup> Ting Qu,<sup>†</sup> Xiaoxiong Zheng,<sup>†</sup> Yongbin Zhao,<sup>‡</sup> and Aihua Chen<sup>\*,†,§</sup>

<sup>†</sup>School of Materials Science and Engineering, Beihang University, Beijing 100191, P. R. China

<sup>‡</sup>Shandong Oubo New Material Co Ltd, Shandong 257088, P. R. China

<sup>§</sup>Beijing Advanced Innovation Centre for Biomedical Engineering, Beihang University, Beijing 100191, P. R. China

### Table of Contents

|                                      |    |
|--------------------------------------|----|
| 1. Materials and methods.....        | 2  |
| 2. Characterization.....             | 4  |
| 3. Supporting figures and table..... | 6  |
| 4. References.....                   | 15 |

## 1. Materials and methods

### 1.1 Materials

4-cyanopentanoic acid dithiobenzoate (CPADB, 97%, Aladdin), 4,4'-azobis(4-cyanovaleric acid) (ACVA, 98%, J&K Chemical), 1,1,3,3-tetramethylguanidine (TMG, 99%, Macklin), benzyl chloride (99%, Macklin), ethanol (99.8%, Aladdin), dimethyl sulfoxide (DMSO, 99.8%, Macklin), chlorobenzene (99%, Aladdin) were used as received. Methylacrylic acid (MAA, 99%, Aladdin) was purified by passing through a basic alumina oxide column prior to storage at -10 °C. The 11-[4-(4-butylphenylazo)phenoxy]undecyl methacrylate (MAAz) monomer was synthesized following the previously reported method.<sup>[1]</sup>

### 1.2 Synthesis of PMAA macro-CTA via RAFT solution polymerization

In a typical RAFT solution polymerization for synthesis of PMAA<sub>112</sub> macro-CTA, MAA (10.32 g, 120 mmol), CPADB (0.28 g, 1.00 mmol), ACVA (56.1 mg, 0.20 mmol), and ethanol (10.32 g) were added to a reaction tube. The mixture was degassed by three freeze-pump-thaw cycles, and sealed under vacuum. The reaction tube was placed in an oil bath at 70 °C. After 5 h, the reaction was quenched by dipping the tube in ice/water and the tube was broken. The mixture was diluted with ethanol, precipitated in n-hexane 3 times. PMAA macro-CTA was purified via dialysis (MWCO 3 kg/mol) in ethanol for 3 days. Then dry under vacuum. The product was a pink solid (9.2 g, monomer conversion 89%). The DP was measured by <sup>1</sup>H NMR in DMSO-*d*<sub>6</sub> (DP=112). The  $M_n$  and  $M_w/M_n$  were measured by GPC ( $M_n$ =11.7 k,  $M_w/M_n$ =1.07).

### 1.3 Synthesis of PMAA-*b*-PMAAz block copolymer nanoparticles via RAFT dispersion polymerization

In a typical dispersion polymerization formulation targeting PMAA<sub>112</sub>-*b*-PMAAz<sub>150</sub> at 20% w/w solids, PMAA<sub>112</sub> macro-CTA (0.1 g, 0.010 mmol), ACVA (0.58 mg, 0.002 mmol), MAAz (0.77 g, 1.56 mmol) and ethanol (3.48

g) were added to a reaction tube. The mixture was degassed by three freeze-pump-thaw cycles, and sealed under vacuum. The reaction tube was placed in an oil bath at 70 °C. After 12 h, the reaction was quenched by dipping the tube in ice/water and the tube was broken. The resulting block copolymer was characterized by using <sup>1</sup>H NMR, DLS, AFM, SEM and TEM.

#### **1.4 Chemical Modification of PMAA macro-CTA and PMAA-*b*-PMAAz block copolymer**

For GPC studies, the carboxylic acid groups on the PMAA macro-CTA and PMAA-*b*-PMAAz block copolymer were fully esterified using benzyl chloride with TMG as a promoter, as reported by Bai and coworkers.<sup>[2]</sup> In a typical chemical modification of PMAA macro-CTA, PMAA (43 mg, 0.5 unit mmol) was dissolved in DMSO (1 mL). Then TMG (115 mg, 1 mmol) and benzyl chloride (95 mg, 0.75 mmol) were added. Then the mixture was stirred over night at room temperature. The resulting polymer was precipitated into a large amount of methanol, and collected by filtration and then drying under vacuum at 40 °C. The chemical modification of PMAA-*b*-PMAAz block copolymer is similar with PMAA macro-CTA except the 75/25% w/w CHCl<sub>3</sub>/DMSO mixtures as the solvent.

#### **1.5 Photo-responsive of the PMAA-*b*-PMAAz nanoparticles prepared by PISA**

A small aliquot mixture after PISA was diluted 10 times using ethanol. The mixture was irradiated by 360 nm UV light (OMRON, ZUV-H20MC) 1 hour with stirring. Then, the mixture was stored in a dark bottle. The morphologies and sizes were characterized by using TEM and DLS.

## 2. Characterization

**2.1 NMR spectroscopy.** NMR spectra were measured on a Bruker DMX spectrometer, operating at 400 MHz for  $^1\text{H}$ . The CPADB was characterized using  $\text{CDCl}_3$  as the solvent. The PMAA macro-CTA were characterized using  $\text{DMSO-}d_6$  as the solvent. The PMAA-*b*-PMAAz block copolymers were characterized using 75/25% w/w  $\text{CDCl}_3/\text{DMSO-}d_6$  mixtures as the solvent to make sure the complete dissolution of the two blocks.

**2.2 Gel permeation chromatography (GPC).** The  $M_n$  and  $M_w/M_n$  ratios of polymers (have been fully esterified using benzyl chloride with TMG as a promoter) were performed on a Waters 2410 gel permeation chromatography (GPC) equipped with two columns (Styragel Column, HR 4, 5  $\mu\text{m}$ , 7.8 mm x 300 mm, 5-600 K and Styragel Column, HR 2, 5  $\mu\text{m}$ , 7.8 mm x 300 mm, 500-20 K). THF (HPLC) was used as the eluent with the flow rate of 1 mL/min. Molecular weight was calibrated by a series of monodisperse polystyrene standards.

**2.3 Transmission electron microscopy (TEM).** One drop of the dispersions with proper concentration in ethanol was deposited on a carbon-coated copper grid. The solvent was evaporated at room temperature for 1-2 d. The TEM samples obtained were stained by  $\text{RuO}_4$ . TEM images were obtained with a JEM-2100 microscope, operating at 200 kV.

**2.4 Scanning electron microscope (SEM).** One drop of the dispersions with proper concentration in ethanol was deposited on a copper grid. The solvent was evaporated at room temperature for 1-2 d. The SEM samples were gilded before the observation. The SEM images were acquired using Hitachi S4800 field emission scanning electron microscope at 5 kV.

**2.5 Atomic force microscopy (AFM).** One drop of the dispersions with proper concentration in ethanol was deposited on a cleansed silicon wafer. The solvent was

evaporated at room temperature for 1-2 d. AFM height images were collect by using a Bruker Resolve probe microscope under tapping mode.

**2.6 Dynamic light scattering (DLS).** DLS measurements were conducted using a Shandong Naikete NKT-N9 instrument equipped with a 532 nm He-Ne laser at 25 °C. The hydrodynamic sizes of the nanoparticles in ethanol were characterized by analyzing the scattering light at 90°angle.

**2.7 Differential scanning calorimetry (DSC).** The mixture after PISA was volatilized 48 h in room temperature removing ethanol. Then, unreacted monomers and other impurities were removed by Soxhlet extraction 48 h in methanol. DSC analyses were measured using NETZSCH DSC214 instrument calibrated using indium standards. The DSC samples were scanned under air flow from 25 °C to 200 °C at a scanning rate 10 °C /min. The data of first cooling processes and second heating processes were recorded.

**2.8 Small-angle x-ray scattering (SAXS).** A small aliquot mixture after PISA volatilized 48 h in room temperature removing ethanol. Then grinded before measured. SAXS was measured using a Anton-Paar SAXS mc2 diffractometer with Cu K $\alpha$  radiation ( $\lambda=0.154$  nm).

**2.9 Temperature-dependent polarized optical microscopic (POM).** A small aliquot mixture after PISA was dropped to the glass slide, volatilized 48 h in room temperature removing ethanol. POM experiments were done using Shang Guang 59XF microscope fitted with a Shang Guang XRD thermo-control system.

### 3. Supporting figures and table

#### 3.1 Synthesis of PMAA<sub>m</sub>-*b*-PMAAz<sub>n</sub> via RAFT dispersion polymerization

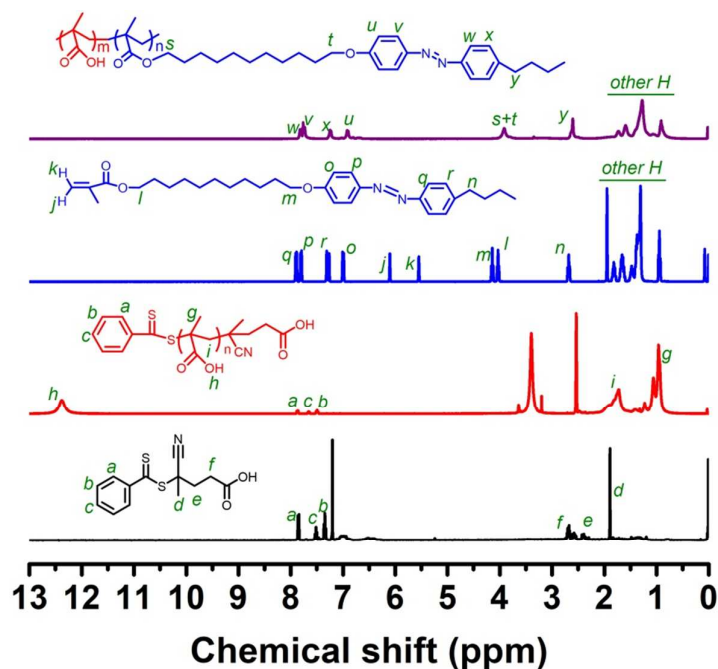

**Figure S1.** Chemical structures and typical <sup>1</sup>H NMR spectra of CPADB, PMAA macro-CTA, MAAz monomer and the PMAA-*b*-PMAAz block copolymer synthesized via RAFT dispersion polymerization.

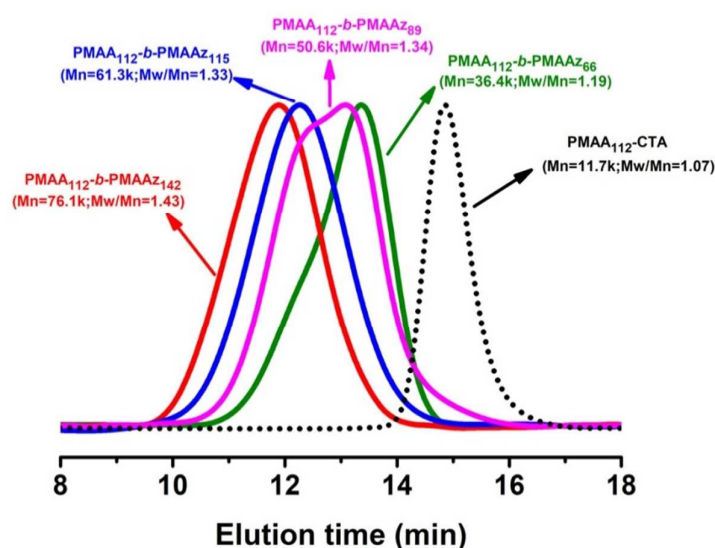

**Figure S2.** GPC traces of the PMAA<sub>112</sub> macro-CTA and a series of corresponding PMAA<sub>112</sub>-*b*-PMAAz<sub>n</sub> block copolymers (THF, polystyrene standards) synthesized via

RAFT dispersion polymerization at 20% w/w in ethanol at 70 °C. All of the polymers were fully esterified using benzyl chloride with TMG as a promoter.

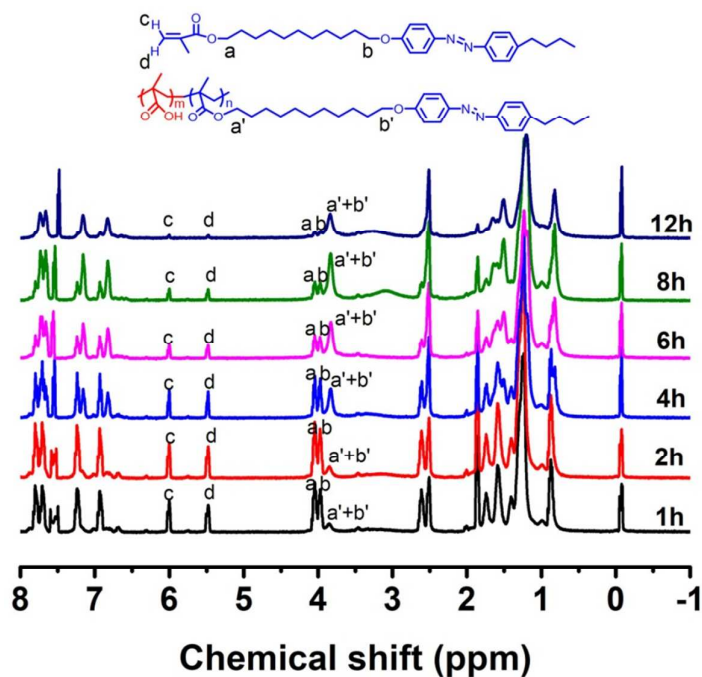

**Figure S3.**  $^1\text{H}$  NMR spectra of the  $\text{PMAA}_{75}\text{-}b\text{-PMAAz}_n$  block copolymers with different polymerization time. Target block copolymer composition was  $\text{PMAA}_{75}\text{-}b\text{-PMAAz}_{150}$ . Conditions:  $[\text{macro-CTA}]/[\text{AIBN}]$  molar ratio = 5.0; total solids concentration = 20% w/w.

The peaks a, b, c, d and a', b' are selected as representative peaks. The areas of a, b, c, d is getting smaller with increasing of the polymerization time. Reversely, the areas of a' + b' are getting larger with increasing of the polymerization time. It indicates that the MAAz monomers are polymerized effectively in this condition.

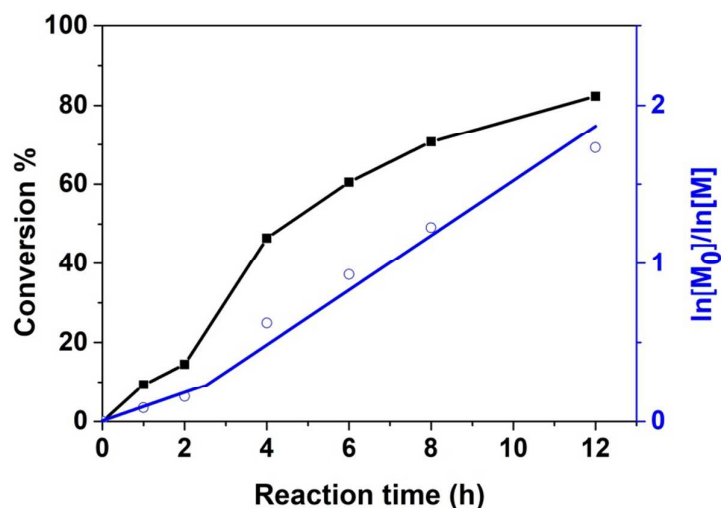

**Figure S4.** Monomer conversion-time plot and the corresponding semilogarithmic plot for the RAFT dispersion polymerization of MAAz. Target block copolymer composition is PMAA<sub>75</sub>-*b*-PMAAz<sub>150</sub>. Conditions: [macro-CTA]/[AIBN] molar ratio= 5.0; total solids concentration = 20% w/w; reaction temperature=70 °C.

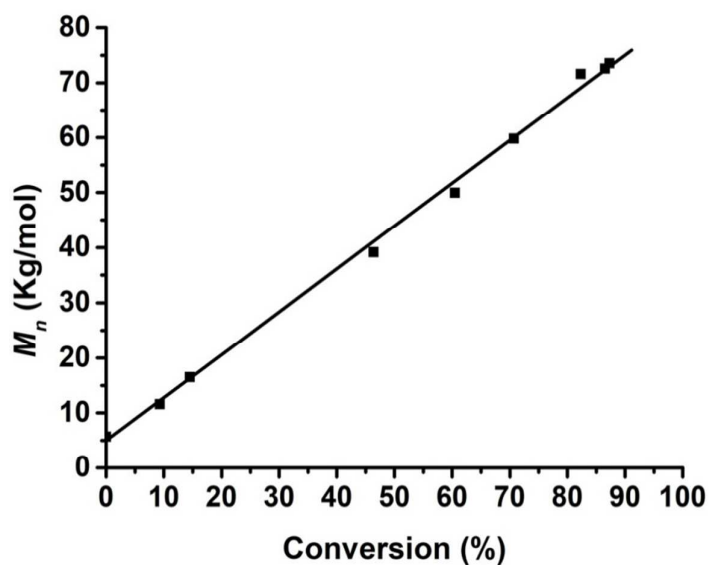

**Figure S5.** Number-average molecular weight-conversion plot for the RAFT dispersion polymerization of MAAz. Target block copolymer composition is PMAA<sub>75</sub>-*b*-PMAAz<sub>150</sub>. Conditions: [macro-CTA]/[AIBN] molar ratio= 5.0; total solids concentration = 20% w/w; Reaction temperature=70 °C.



**Table S1.** Summary of DP, molecular weight, final morphology and particle size obtained from a series of PMAA-*b*-PMAAz block copolymers synthesized via RAFT dispersion polymerization at 70 °C in ethanol<sup>a</sup>.

| Sample | DP of<br>PMAA<br><sup>b</sup> | DP of<br>PMAAz<br><sup>c</sup> | Mn <sup>c</sup><br>(g/mol) | Mass<br>fraction<br>of<br>PMAAz<br>(%) <sup>d</sup> | GPC            |                                | Morphology <sup>e</sup> | DLS <sup>f</sup> |       |
|--------|-------------------------------|--------------------------------|----------------------------|-----------------------------------------------------|----------------|--------------------------------|-------------------------|------------------|-------|
|        |                               |                                |                            |                                                     | M <sub>n</sub> | M <sub>w</sub> /M <sub>n</sub> |                         | Diam<br>(nm)     | PDI   |
| 1      | 112                           | 66                             | 42100                      | 77                                                  | 36400          | 1.19                           | cuboid                  | 108              | 0.188 |
| 2      | 112                           | 89                             | 53400                      | 82                                                  | 50600          | 1.34                           | short belt              | 186              | 0.217 |
| 3      | 112                           | 115                            | 66200                      | 85                                                  | 61300          | 1.33                           | lamella                 | 297              | 0.366 |
| 4      | 112                           | 142                            | 79500                      | 88                                                  | 76100          | 1.43                           | ellipsoidal<br>vesicle  | 335              | 0.130 |
| 5      | 75                            | 48                             | 30100                      | 78                                                  | 29300          | 1.21                           | cuboid                  | 111              | 0.212 |
| 6      | 75                            | 65                             | 38400                      | 83                                                  | 34900          | 1.20                           | short belt              | 248              | 0.289 |
| 7      | 75                            | 84                             | 47800                      | 86                                                  | 43600          | 1.42                           | lamella                 | 393              | 0.375 |
| 8      | 75                            | 123                            | 67000                      | 90                                                  | 54500          | 1.49                           | vesicle                 | 876              | 0.685 |
| 9      | 38                            | 15                             | 10600                      | 70                                                  | 11300          | 1.16                           | worm +<br>lamella       | 243              | 0.484 |
| 10     | 38                            | 18                             | 12100                      | 73                                                  | 13100          | 1.20                           | worm +<br>lamella       | 254              | 0.571 |
| 11     | 38                            | 32                             | 19000                      | 83                                                  | 17800          | 1.35                           | vesicle                 | 395              | 0.166 |
| 12     | 38                            | 44                             | 25000                      | 87                                                  | 23900          | 1.32                           | vesicle                 | 411              | 0.231 |
| 13     | 176                           | 75                             | 52000                      | 71                                                  | 49500          | 1.21                           | sphere +<br>worm        | 217              | 0.276 |
| 14     | 176                           | 87                             | 57900                      | 74                                                  | 58100          | 1.18                           | worm                    | 231              | 0.192 |
| 15     | 176                           | 134                            | 81100                      | 81                                                  | 75800          | 1.28                           | worm                    | 352              | 0.206 |
| 16     | 176                           | 190                            | 108600                     | 86                                                  | 109700         | 1.45                           | worm +<br>lamella       | 408              | 0.420 |
| 17     | 176                           | 265                            | 145500                     | 90                                                  | 138600         | 1.48                           | precipitate             | --               | --    |

a) Conditions: [macro-CTA]/[ACVA] molar ratio = 5.0; total solids concentration = 20% w/w.

b) Determined by <sup>1</sup>H NMR spectroscopy in DMSO-*d*<sub>6</sub>.

- c) Determined by  $^1\text{H}$  NMR spectroscopy in 75/25%w/w  $\text{CDCl}_3/\text{DMSO-}d_6$  mixtures.
- d) LC weight fraction determined by  $^1\text{H}$  NMR.
- e) The copolymer particle morphology is determined by TEM observations.
- f) Intensity-average diameters were calculated using a cumulants analysis software provided by the instrument manufacturer. PDI denotes the polydispersity.

### 3.2 Morphologies of different samples

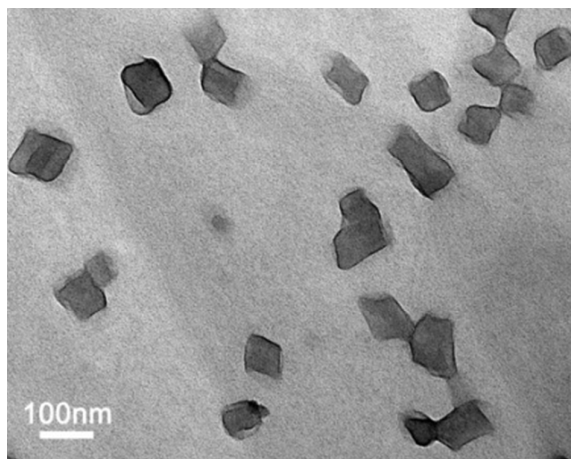

**Figure S6.** TEM enlarged image of the PMAA<sub>75</sub>-*b*-PMAAz<sub>48</sub> nanoparticles.

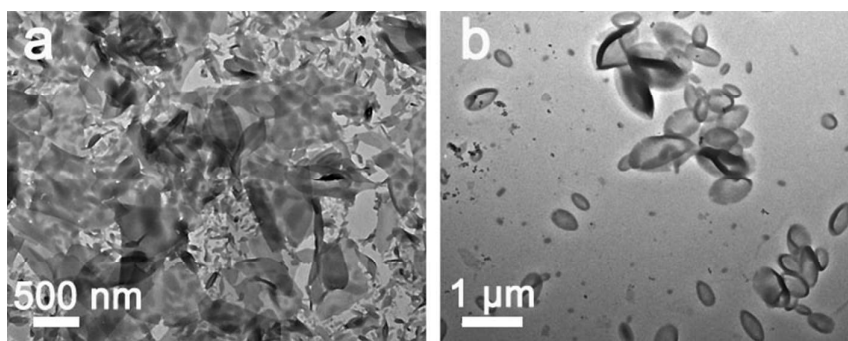

**Figure S7.** TEM images of the a) PMAA<sub>38</sub>-*b*-PMAAz<sub>18</sub>, and b) PMAA<sub>38</sub>-*b*-PMAAz<sub>32</sub> nanoparticles, showing a hybrid morphology of lamellae and worms, and a vesicle morphology, respectively.

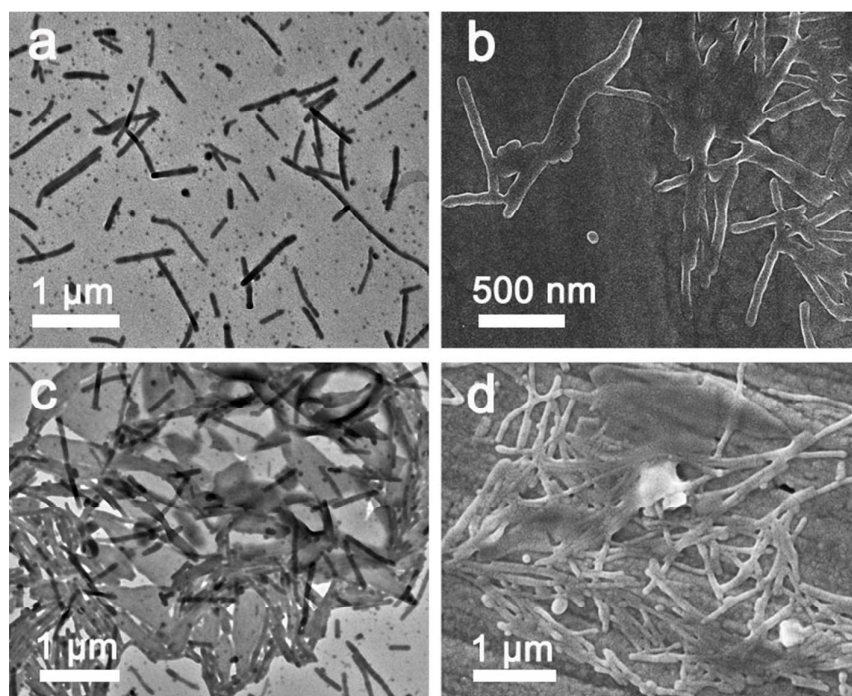

**Figure S8.** TEM and the corresponding SEM images of the a-b) PMAA<sub>176</sub>-*b*-PMAAz<sub>134</sub>, and c-d) PMAA<sub>176</sub>-*b*-PMAAz<sub>190</sub> nanoparticles, respectively.

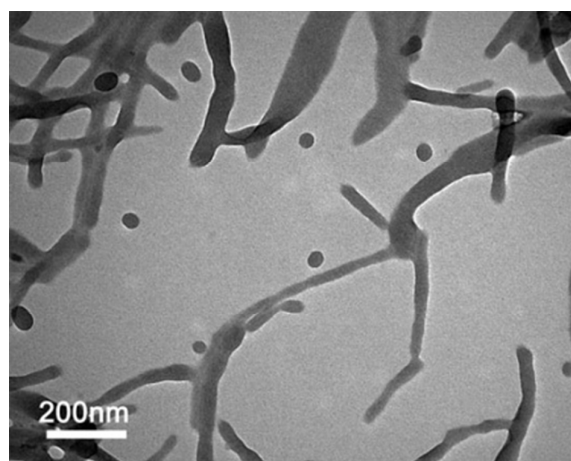

**Figure S9.** TEM image of the PMAA<sub>176</sub>-*b*-PMAAz<sub>75</sub> nanoparticles.

### 3.3 The mesomorphic properties of PMAA-*b*-PMAAz and nanoparticles

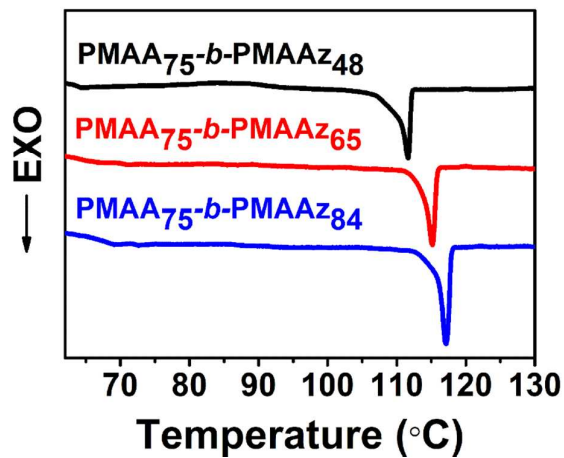

**Figure S10.** DSC curves of the PMAA<sub>75</sub>-*b*-PMAAz<sub>n</sub> block copolymers on the first cooling processes with a cooling rate of 10 °C/min.

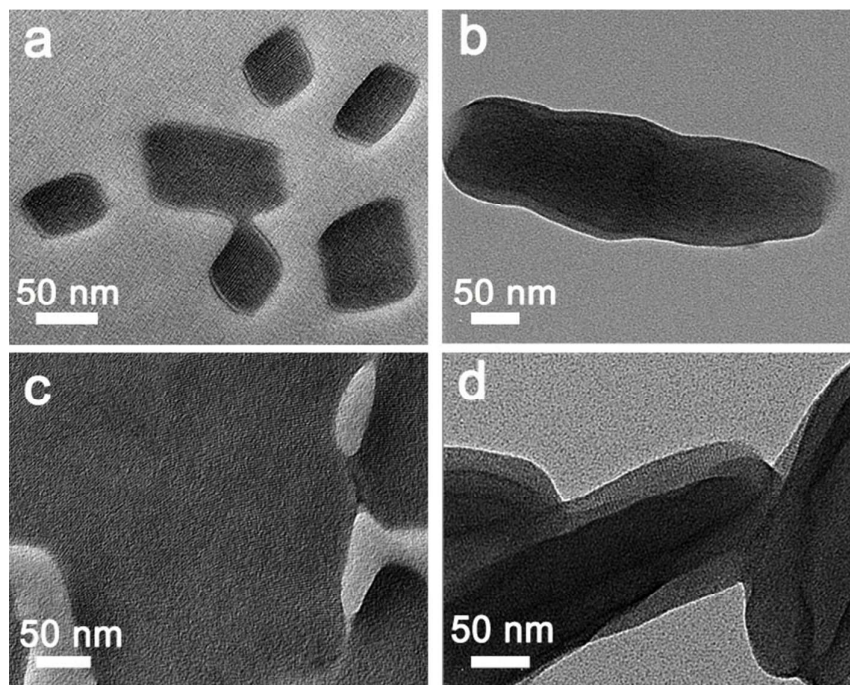

**Figure S11.** TEM magnified images of the PMAA<sub>112</sub>-*b*-PMAAz<sub>n</sub> nanoparticles with various DP<sub>PMAAz</sub>: a) PMAA<sub>112</sub>-*b*-PMAAz<sub>66</sub>, b) PMAA<sub>112</sub>-*b*-PMAAz<sub>89</sub>, c) PMAA<sub>112</sub>-*b*-PMAAz<sub>115</sub>, and d) PMAA<sub>112</sub>-*b*-PMAAz<sub>142</sub>. Smectic stripes can be observed in all images.

### 3.4 The stabilization of PMAA-*b*-PMAAz nanoparticles via PISA

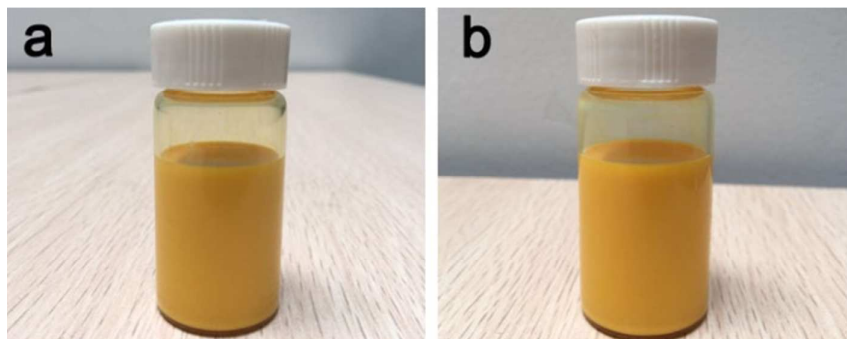

**Figure S12.** The photographs of the PMAA<sub>112</sub>-*b*-PMAAz<sub>142</sub> nanoparticles: a) as-prepared b) after three months at room temperature.

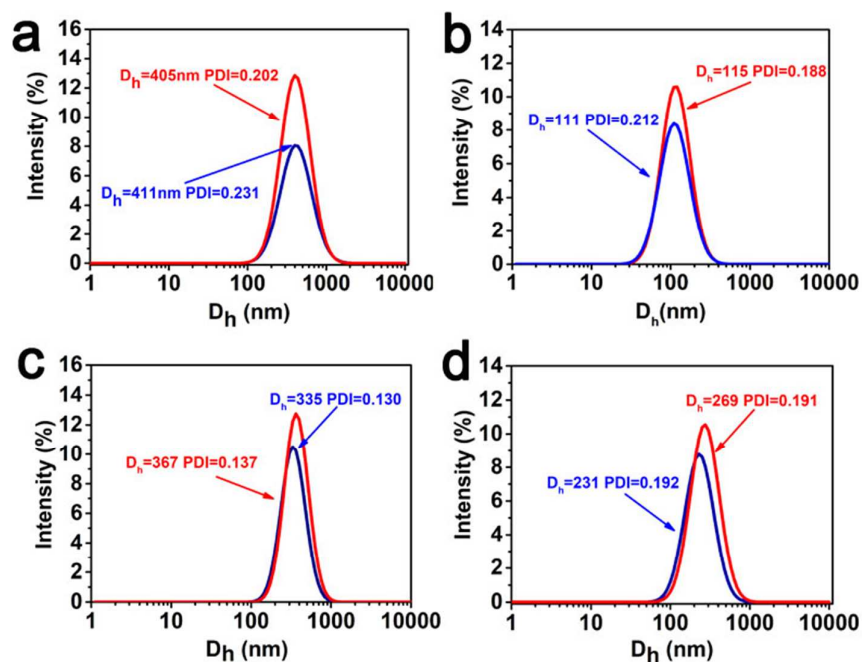

**Figure S13.** Typical Intensity-average size distributions (blue: as-prepared, red: after three months at room temperature) of the a) PMAA<sub>38</sub>-PMAAz<sub>44</sub>, b) PMAA<sub>75</sub>-PMAAz<sub>48</sub>, c) PMAA<sub>112</sub>-PMAAz<sub>142</sub>, and d) PMAA<sub>176</sub>-PMAAz<sub>87</sub>, respectively.

### 3.5 Photo-responsive of the PMAA-*b*-PMAAz solution and the nanoparticles prepared by PISA

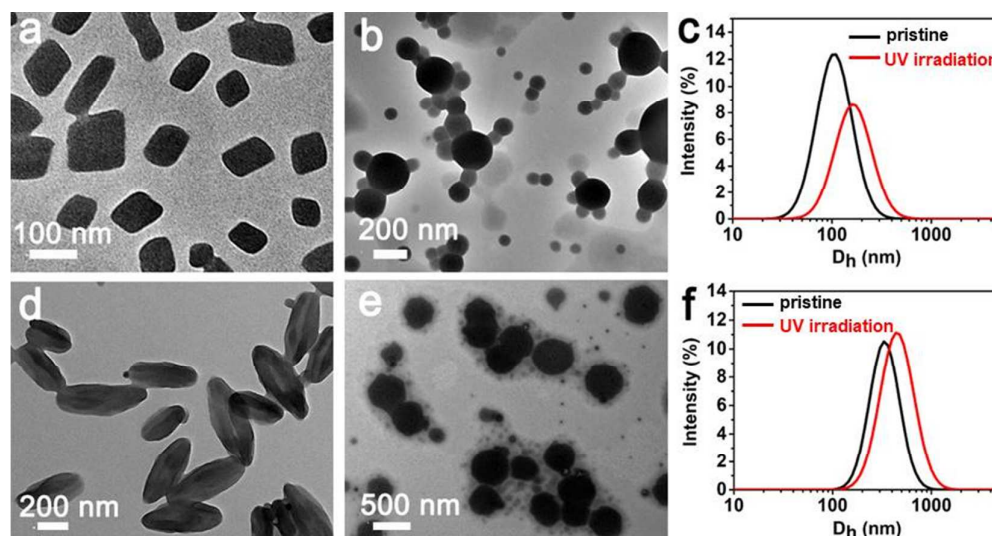

**Figure S14.** TEM images of the PMAA<sub>112</sub>-*b*-PMAAz<sub>n</sub> nanoparticles at different conditions: a) and d) pristine, b) and e) after UV irradiation. c) and f) The respective corresponding particle size and distribution obtained from the DLS measurements. For a-c), PMAA<sub>112</sub>-*b*-PMAAz<sub>66</sub>, and for d-f), PMAA<sub>112</sub>-*b*-PMAAz<sub>142</sub>, respectively.

## 4. References

- [1] Y. Tian, K. Watanabe, X. Kong, J. Abe, T. Iyoda, *Macromolecules* **2002**, *35*, 3739-3747.
- [2] Q. Li, Y. Bao, H. Wang, F. Du, Q. Li, B. Jin, R. Bai, *Polym. Chem.* **2013**, *4*, 2891-2897.
